# Supplementary material for: Developing a shared decision support framework for aortic root surgery in Marfan syndrome
Source: PubMed Central journal article supplement — Heart. 2017 Aug 5;104(6):480–6. doi: 10.1136/heartjnl-2017-311598 (PMC5861390; doi:10.1136/heartjnl-2017-311598), 2017-08-05
Supplement: heartjnl-2017-311598supp001.pdf [file heartjnl-2017-311598supp001.pdf]

Questionnaire as a table

|   |                                                                                                                                |                                                                                         |                                                              |
|---|--------------------------------------------------------------------------------------------------------------------------------|-----------------------------------------------------------------------------------------|--------------------------------------------------------------|
| 1 | How important is it to you to postpone having an operation on your aorta for as long as the doctors think it is safe to do so? | 0 1 2 3 4 5 6 7 8 9 10<br>not at all<br>important to me<br>extremely<br>important to me | Please write in any thoughts of your own about this question |
| 2 | How important is it to you to avoid taking anticoagulant (blood thinning) medication?                                          | 0 1 2 3 4 5 6 7 8 9 10<br>not at all<br>important to me<br>extremely<br>important to me | Please write in any thoughts of your own about this question |
| 3 | How important is it to you, if you need to have an operation on your aorta, to get on with it and have it behind you?          | 0 1 2 3 4 5 6 7 8 9 10<br>not at all<br>important to me<br>extremely<br>important to me | Please write in any thoughts of your own about this question |
| 4 | How important is it to you to avoid lifelong medication such as beta blockers or losartan?                                     | 0 1 2 3 4 5 6 7 8 9 10<br>not at all<br>important to me<br>extremely<br>important to me | Please write in any thoughts of your own about this question |
| 5 | How important is it to you to avoid repeated visits to the hospital for tests?                                                 | 0 1 2 3 4 5 6 7 8 9 10<br>not at all<br>important to me<br>extremely<br>important to me | Please write in any thoughts of your own about this question |
| 6 | How important is to you to have a physically active lifestyle?                                                                 | 0 1 2 3 4 5 6 7 8 9 10<br>not at all<br>important to me<br>extremely<br>important to me | Please write in any thoughts of your own about this question |
| 7 | How important is it to you to avoid anticoagulation which might be an obstacle to having a baby? (Men may answer.)             | 0 1 2 3 4 5 6 7 8 9 10<br>not at all<br>important to me<br>extremely<br>important to me | Please write in any thoughts of your own about this question |
| 8 | How important is it to you to have no noise from your heart valve?                                                             | 0 1 2 3 4 5 6 7 8 9 10<br>not at all<br>important to me<br>extremely<br>important to me | Please write in any thoughts of your own about this question |

For the purposes of the study these questions were set out as a web form. In clinical practice this could be presented to the patient (paper or electronic) to take home with sufficient time and space to write in their reflections. It would then be a document for discussion, representing a personal profile of the values brought to the consultation, based on whatever prior knowledge, experience or assumptions the patient might have.
