# Supplementary figures and images for: Developing a shared decision support framework for aortic root surgery in Marfan syndrome
Source: PubMed Central journal article supplement — Heart. 2017 Aug 5;104(6):480–6. doi: 10.1136/heartjnl-2017-311598 (PMC5861390; doi:10.1136/heartjnl-2017-311598), 2017-08-05

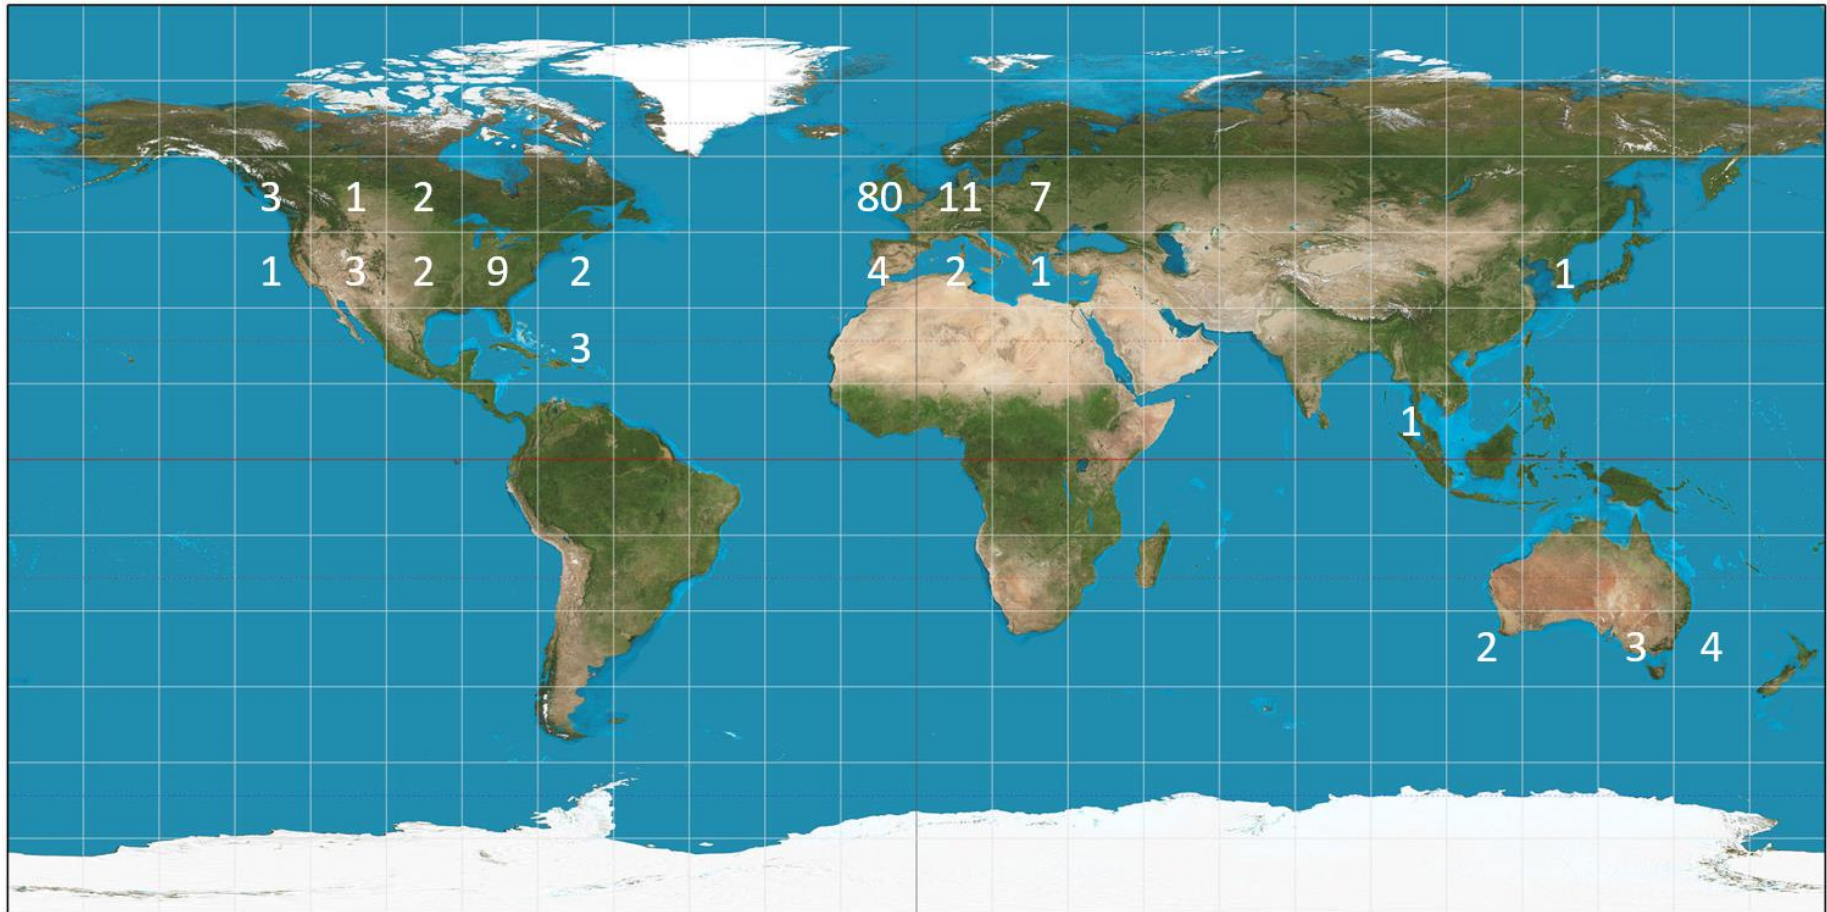

Geographical location of respondents

Supplement: heartjnl-2017-311598supp003.pdf [file heartjnl-2017-311598supp003.pdf]
